# Supplementary material for: Minocycline targets multiple secondary injury mechanisms in traumatic spinal cord injury
Source: PubMed Central journal article supplement — Neural Regen Res. 2017 May;12(5):702–13. doi: 10.4103/1673-5374.206633 (PMC5461601; doi:10.4103/1673-5374.206633), 2017-05
Supplement: NRR-12-702_Suppl1.pdf [file NRR-12-702_Suppl1.pdf]

**Additional file: Open peer review report 1 on “Minocycline targets multiple secondary injury mechanisms in traumatic spinal cord injury”.**

**Reviewer:** Jafri Malin Abdullah, University Sains Malaysia, Malaysia

**Comments to the author:**

There are 3 missing references:

1. Malays J Med Sci. 2017 Mar; 24(1): 31-39.

Published online 2017 Feb 24. doi: 10.21315/mjms2017.24.1.4

PMCID: PMC5346001

The Effects of Minocycline on Spinal Root Avulsion Injury in Rat Model

Tan Yew Chin, Sim Sze Kiat, Hizal Ghazali Faizul, Wutian Wu, and Jafri Malin Abdullah

2, Sains Malaysiana 45(11)(2016): 1641-1648

Histological Analysis of Motoneuron Survival and Microglia Inhibition

After Nerve Root Avulsion Treated with Nerve Graft Implantation

and Minocycline: An Experimental Study

FAIZUL H GHAZALI\*, WUTIAN WU & JAFRI M ABDULLAH

3 Paclitaxel Inhibits expression of neuronal nitric Oxide Synthase and Prevents Mitochondrial Dysfunction in Spinal Ventral Horn in Rats After C7 Spinal Root Avulsion Sze Kiat Sim, Yew Chin

TaN, Jong Huat TEE Abdul Aziz Yusoff, Jafri Malin Abdullah Turk Neurosurg 2015, Vol: 25, No: 4, 617-624
